# Supplementary material for: Traits, phylogeny and host cell receptors predict Ebolavirus host status among African mammals
Source: PubMed Central journal article supplement (PMC9815631; doi:10.1371/journal.pntd.0010993), 2022-12-21
Supplement: pntd.0010993.s002.pdf [file pntd.0010993.s002.pdf]

**S1 Table for “Traits, phylogeny and host cell receptors predict *Ebolavirus* host status of African mammals”**

Mekala Sundaram, John Paul Schmidt, Barbara A. Han, John M. Drake, Patrick R. Stephens

**S1 Table. Relative importances of predictor variables in ridge models.** Relative importance computed as change in AUC after addition of each variable to a null model of percent scavenging and percent seed in diet. The null model had AUC of 0.477 or no ability to discriminate between negative or positive infection states given the two predictors were not significantly associated with infection status.

| Variable                 | Change in AUC |
|--------------------------|---------------|
| sample size              | 0.341         |
| gestation length d       | 0.286         |
| max longevity d          | 0.257         |
| c28                      | 0.252         |
| age first reproduction d | 0.240         |
| c4                       | 0.216         |
| litter size n            | 0.215         |
| c12                      | 0.215         |
| brain mass g             | 0.214         |
| c13                      | 0.211         |
| percent fruit            | 0.200         |
| litters per year n       | 0.199         |
| c3                       | 0.194         |
| adult mass g             | 0.174         |
| c7                       | 0.168         |
| c14                      | 0.145         |
| c11                      | 0.143         |
| c6                       | 0.133         |
| c23                      | 0.098         |
| c10                      | 0.087         |
| distance to spillover m  | 0.085         |
| c38                      | 0.080         |
| c29                      | 0.075         |
| c15                      | 0.074         |
| c5                       | 0.069         |
| c17                      | 0.069         |
| c19                      | 0.062         |
| c43                      | 0.058         |
| c8                       | 0.052         |

|                    |        |
|--------------------|--------|
| c18                | 0.038  |
| c26                | 0.037  |
| c37                | 0.036  |
| c35                | 0.030  |
| c1                 | 0.029  |
| c25                | 0.028  |
| c45                | 0.026  |
| c9                 | 0.025  |
| c34                | 0.024  |
| c31                | 0.024  |
| c46                | 0.023  |
| c48                | 0.019  |
| c20                | 0.017  |
| c39                | 0.016  |
| c44                | 0.012  |
| c47                | 0.011  |
| percent plant      | 0.010  |
| c21                | 0.009  |
| c30                | 0.001  |
| c16                | -0.001 |
| terrestrial volant | -0.004 |
| c22                | -0.004 |
| c41                | -0.005 |
| c2                 | -0.005 |
| c24                | -0.005 |
| c36                | -0.006 |
| c42                | -0.008 |
| c33                | -0.012 |
| c32                | -0.019 |
| c40                | -0.034 |
| c27                | -0.052 |

---
