# Supplementary material for: Traits, phylogeny and host cell receptors predict Ebolavirus host status among African mammals
Source: PubMed Central journal article supplement (PMC9815631; doi:10.1371/journal.pntd.0010993), 2022-12-21
Supplement: pntd.0010993.s003.pdf [file pntd.0010993.s003.pdf]

## S2 Table for “Traits, phylogeny and host cell receptors predict *Ebolavirus* host status of African mammals”

Mekala Sundaram, John Paul Schmidt, Barbara A. Han, John M. Drake, Patrick R. Stephens

**S2 Table. Sensitivity of mortality of animal host model to uncertainty in phylogenetic relationships.** We repeated our ridge regression model predicting mortality with trait variables and phylogenetic eigenvectors from 100 random trees from the Bayesian posterior distribution of trees in Upham et al (DOI: 10.1371/journal.pbio.3000494). Table summarizes for each predictor variable, the proportion of n=100 runs where the predictor was significantly related to mortality at  $\alpha$  of 0.05. Table also summarizes the t-statistics from all runs, providing the minimum, lower 2.5% quantile, mean, median, upper 97.5% quantile, maximum t-value and the skewness of the distribution. Note that the t-statistics for all the phylogenetic eigenvectors were summarized after calculating their absolute values, due to random assignment of directionality to mammal clades across different trees from the posterior distribution. A value of NA indicates lower phylogenetic eigenvectors that were used from only one posterior tree to account for 75% cumulative variation in phylogenetic information; therefore, a histogram of t-statistics cannot be computed from one value. Bold faced values represent predictors that were significantly related to mortality in 90% of repeats across trees.

| Variables                 | proportion   |               |               |               |               |               |               |               |
|---------------------------|--------------|---------------|---------------|---------------|---------------|---------------|---------------|---------------|
|                           | runs         | min           | l95           | mean          | median        | u95           | max           | skew          |
| adult_mass_g              | 0.000        | -0.557        | -0.529        | 0.009         | -0.058        | 1.302         | 1.577         | 2.171         |
| brain_mass_g              | 0.000        | 0.330         | 0.374         | 0.664         | 0.622         | 1.518         | 1.801         | 2.608         |
| max_longevity_d           | 0.090        | 0.945         | 1.003         | 1.562         | 1.550         | 2.560         | 2.711         | 1.374         |
| age_first_reproduction_d  | 0.090        | 1.051         | 1.099         | 1.493         | 1.457         | 2.437         | 2.617         | 2.013         |
| <b>gestation_length_d</b> | <b>1.000</b> | <b>2.044</b>  | <b>2.083</b>  | <b>2.374</b>  | <b>2.365</b>  | <b>2.796</b>  | <b>2.816</b>  | <b>0.516</b>  |
| litter_size_n             | 0.000        | -0.816        | -0.705        | -0.267        | -0.257        | 0.037         | 0.142         | -0.522        |
| <b>litters_per_year_n</b> | <b>0.950</b> | <b>-3.166</b> | <b>-3.122</b> | <b>-2.547</b> | <b>-2.567</b> | <b>-1.883</b> | <b>-1.809</b> | <b>0.331</b>  |
| det_scav                  | 0.000        | 0.615         | 0.740         | 0.982         | 0.985         | 1.249         | 1.365         | 0.024         |
| det_seed                  | 0.000        | -0.720        | -0.673        | -0.513        | -0.524        | -0.322        | -0.296        | 0.189         |
| det_fruit                 | 0.000        | 0.421         | 0.454         | 0.615         | 0.610         | 0.821         | 0.871         | 0.303         |
| det_plantother            | 0.000        | -1.596        | -1.536        | -1.305        | -1.337        | -0.749        | -0.651        | 1.747         |
| prox                      | 0.000        | -0.168        | -0.115        | 0.291         | 0.262         | 1.224         | 1.474         | 2.011         |
| <b>terrestrial_volant</b> | <b>1.000</b> | <b>-2.589</b> | <b>-2.504</b> | <b>-2.305</b> | <b>-2.310</b> | <b>-2.110</b> | <b>-2.083</b> | <b>-0.036</b> |
| c1                        | 0.010        | 0.003         | 0.032         | 0.501         | 0.347         | 1.641         | 2.466         | 1.610         |
| c2                        | 0.190        | 0.008         | 0.064         | 1.055         | 0.883         | 2.469         | 2.692         | 0.545         |
| <b>c3</b>                 | <b>1.000</b> | <b>2.016</b>  | <b>2.211</b>  | <b>3.029</b>  | <b>3.083</b>  | <b>3.643</b>  | <b>3.748</b>  | <b>-0.676</b> |
| c4                        | 0.230        | 0.054         | 0.200         | 1.460         | 1.577         | 2.551         | 3.117         | -0.178        |
| c5                        | 0.600        | 0.021         | 0.051         | 1.903         | 2.520         | 3.344         | 3.428         | -0.507        |
| c6                        | 0.320        | 0.008         | 0.031         | 1.107         | 0.511         | 3.056         | 3.427         | 0.649         |
| c7                        | 0.040        | 0.003         | 0.007         | 0.311         | 0.191         | 2.268         | 2.852         | 3.700         |
| c8                        | 0.000        | 0.044         | 0.079         | 0.771         | 0.845         | 1.304         | 1.507         | -0.333        |

|     |       |       |       |       |       |       |       |        |
|-----|-------|-------|-------|-------|-------|-------|-------|--------|
| c9  | 0.060 | 0.063 | 0.111 | 1.162 | 1.180 | 2.069 | 2.095 | -0.230 |
| c10 | 0.160 | 0.502 | 0.819 | 1.527 | 1.633 | 2.112 | 2.175 | -0.348 |
| c11 | 0.150 | 0.313 | 0.802 | 1.517 | 1.430 | 2.673 | 2.988 | 0.879  |
| c12 | 0.780 | 0.404 | 1.261 | 2.366 | 2.521 | 3.223 | 3.313 | -0.942 |
| c13 | 0.220 | 0.055 | 0.123 | 1.278 | 1.427 | 2.768 | 3.069 | 0.194  |
| c14 | 0.060 | 0.012 | 0.035 | 0.957 | 0.794 | 2.252 | 2.607 | 0.457  |
| c15 | 0.020 | 0.006 | 0.058 | 0.883 | 0.736 | 1.731 | 2.340 | 0.208  |
| c16 | 0.000 | 0.006 | 0.061 | 0.768 | 0.708 | 1.694 | 1.817 | 0.437  |
| c17 | 0.000 | 0.001 | 0.034 | 0.785 | 0.812 | 1.469 | 1.607 | -0.272 |
| c18 | 0.000 | 0.050 | 0.103 | 0.766 | 0.795 | 1.254 | 1.445 | -0.417 |
| c19 | 0.000 | 0.005 | 0.074 | 0.844 | 0.874 | 1.547 | 1.891 | -0.109 |
| c20 | 0.010 | 0.031 | 0.071 | 0.928 | 0.925 | 1.748 | 2.127 | 0.000  |
| c21 | 0.000 | 0.016 | 0.083 | 1.071 | 1.116 | 1.855 | 1.898 | -0.466 |
| c22 | 0.010 | 0.045 | 0.148 | 0.953 | 0.997 | 1.624 | 1.988 | -0.282 |
| c23 | 0.000 | 0.118 | 0.246 | 0.833 | 0.876 | 1.420 | 1.753 | 0.017  |
| c24 | 0.010 | 0.249 | 0.442 | 0.971 | 0.895 | 1.658 | 1.993 | 0.437  |
| c25 | 0.030 | 0.136 | 0.396 | 0.984 | 0.935 | 1.961 | 2.177 | 0.676  |
| c26 | 0.020 | 0.146 | 0.197 | 0.941 | 0.881 | 1.731 | 2.079 | 0.502  |
| c27 | 0.000 | 0.010 | 0.138 | 0.888 | 0.818 | 1.575 | 1.711 | 0.285  |
| c28 | 0.000 | 0.028 | 0.112 | 0.807 | 0.749 | 1.579 | 1.836 | 0.354  |
| c29 | 0.000 | 0.020 | 0.030 | 0.518 | 0.374 | 1.405 | 1.614 | 0.852  |
| c30 | 0.020 | 0.032 | 0.364 | 1.193 | 1.239 | 1.859 | 2.188 | -0.505 |
| c31 | 0.020 | 0.034 | 0.203 | 1.132 | 1.066 | 1.906 | 2.353 | -0.029 |
| c32 | 0.000 | 0.004 | 0.224 | 1.141 | 1.141 | 1.763 | 1.864 | -0.452 |
| c33 | 0.000 | 0.053 | 0.095 | 0.873 | 0.856 | 1.821 | 1.907 | 0.196  |
| c34 | 0.000 | 0.000 | 0.017 | 0.768 | 0.761 | 1.650 | 1.943 | 0.256  |
| c35 | 0.000 | 0.022 | 0.039 | 0.636 | 0.543 | 1.501 | 1.601 | 0.494  |
| c36 | 0.000 | 0.005 | 0.024 | 0.567 | 0.481 | 1.382 | 1.633 | 0.659  |
| c37 | 0.010 | 0.017 | 0.041 | 0.688 | 0.660 | 1.617 | 2.006 | 0.532  |
| c38 | 0.000 | 0.038 | 0.142 | 0.725 | 0.671 | 1.463 | 1.724 | 0.493  |
| c39 | 0.000 | 0.043 | 0.085 | 0.833 | 0.839 | 1.552 | 1.749 | -0.031 |
| c40 | 0.000 | 0.011 | 0.094 | 0.846 | 0.856 | 1.708 | 1.802 | 0.154  |
| c41 | 0.000 | 0.028 | 0.096 | 0.884 | 0.915 | 1.695 | 1.757 | -0.079 |
| c42 | 0.000 | 0.002 | 0.245 | 0.875 | 0.868 | 1.513 | 1.666 | -0.024 |
| c43 | 0.000 | 0.194 | 0.207 | 0.893 | 0.813 | 1.734 | 1.847 | 0.397  |
| c44 | 0.000 | 0.028 | 0.100 | 0.929 | 0.878 | 1.714 | 1.859 | 0.032  |
| c45 | 0.000 | 0.111 | 0.180 | 0.934 | 0.948 | 1.631 | 1.787 | -0.022 |
| c46 | 0.000 | 0.006 | 0.058 | 0.885 | 0.902 | 1.594 | 1.733 | -0.146 |
| c47 | 0.000 | 0.110 | 0.175 | 0.920 | 0.889 | 1.618 | 1.720 | 0.113  |
| c48 | 0.000 | 0.070 | 0.142 | 0.859 | 0.898 | 1.568 | 1.623 | -0.075 |

|     |       |       |       |       |       |       |       |        |
|-----|-------|-------|-------|-------|-------|-------|-------|--------|
| c49 | 0.000 | 0.405 | 0.454 | 0.907 | 0.875 | 1.497 | 1.606 | 0.484  |
| c50 | 0.000 | 0.510 | 0.513 | 0.832 | 0.811 | 1.303 | 1.391 | 0.683  |
| c51 | 0.000 | 0.418 | 0.471 | 0.963 | 1.038 | 1.264 | 1.278 | -0.702 |
| c52 | 0.000 | 0.950 | 0.957 | 1.103 | 1.084 | 1.281 | 1.294 | 0.258  |
| c53 | 0.000 | 0.666 | 0.680 | 0.948 | 0.917 | 1.268 | 1.292 | 0.240  |
| c54 | 0.000 | NA    | NA    | NA    | NA    | NA    | NA    | NA     |

---
