# Supplementary material for: Traits, phylogeny and host cell receptors predict Ebolavirus host status among African mammals
Source: PubMed Central journal article supplement (PMC9815631; doi:10.1371/journal.pntd.0010993), 2022-12-21
Supplement: pntd.0010993.s004.pdf [file pntd.0010993.s004.pdf]

### S3 Table for “Traits, phylogeny and host cell receptors predict *Ebolavirus* host status of African mammals”

Mekala Sundaram, John Paul Schmidt, Barbara A. Han, John M. Drake, Patrick R. Stephens

#### S3 Table. Sensitivity of infection status model to uncertainty in phylogenetic relationships.

We repeated our ridge regression model predicting mortality with trait variables and phylogenetic eigenvectors from 100 random trees from the Bayesian posterior distribution of trees in Upham et al (DOI: 10.1371/journal.pbio.3000494). Table summarizes for each predictor variable, the proportion of n=100 runs where the predictor was significantly related to mortality at  $\alpha$  of 0.05. Table also summarizes the t-statistics from all runs, providing the minimum, lower 2.5% quantile, mean, median, upper 97.5% quantile, maximum t-value and the skewness of the distribution. Note that the t-statistics for all the phylogenetic eigenvectors were summarized after calculating their absolute values, due to random assignment of directionality to mammal clades across different trees from the posterior distribution. A value of NA indicates lower phylogenetic eigenvectors that were used from only one posterior tree to account for 75% cumulative variation in phylogenetic information; therefore, a histogram of t-statistics cannot be computed from one value. Bold faced values represent predictors that were significantly related to mortality in at least 90% or more of the posterior trees.

| Variable                        | proportion<br>runs | min           | 195           | mean          | median        | u95           | max           | skew          |
|---------------------------------|--------------------|---------------|---------------|---------------|---------------|---------------|---------------|---------------|
| adult_mass_g                    | 0.890              | 1.615         | 1.809         | 2.522         | 2.565         | 3.226         | 3.239         | -0.148        |
| brain_mass_g                    | 0.890              | 1.333         | 1.691         | 2.703         | 2.763         | 3.698         | 3.738         | -0.258        |
| <b>max_longevity_d</b>          | <b>1.000</b>       | <b>3.216</b>  | <b>3.999</b>  | <b>5.281</b>  | <b>5.414</b>  | <b>6.170</b>  | <b>6.201</b>  | <b>-1.046</b> |
| <b>age_first_reproduction_d</b> | <b>1.000</b>       | <b>3.021</b>  | <b>3.839</b>  | <b>5.208</b>  | <b>5.335</b>  | <b>6.194</b>  | <b>6.230</b>  | <b>-0.926</b> |
| <b>gestation_length_d</b>       | <b>1.000</b>       | <b>3.737</b>  | <b>4.561</b>  | <b>5.797</b>  | <b>5.973</b>  | <b>6.492</b>  | <b>6.532</b>  | <b>-1.362</b> |
| <b>litter_size_n</b>            | <b>1.000</b>       | <b>-4.173</b> | <b>-4.157</b> | <b>-3.913</b> | <b>-3.945</b> | <b>-3.480</b> | <b>-3.167</b> | <b>1.247</b>  |
| <b>litters_per_year_n</b>       | <b>1.000</b>       | <b>-4.207</b> | <b>-4.196</b> | <b>-3.619</b> | <b>-3.724</b> | <b>-2.646</b> | <b>-2.185</b> | <b>1.070</b>  |
| det_scav                        | 0.000              | -1.510        | -1.503        | -1.352        | -1.373        | -1.134        | -1.035        | 0.757         |
| det_seed                        | 0.000              | -0.422        | -0.416        | -0.318        | -0.332        | -0.154        | -0.108        | 0.720         |
| <b>det_fruit</b>                | <b>1.000</b>       | <b>2.814</b>  | <b>3.126</b>  | <b>3.975</b>  | <b>4.071</b>  | <b>4.578</b>  | <b>4.598</b>  | <b>-0.711</b> |
| det_plantother                  | 0.000              | -0.387        | -0.361        | -0.135        | -0.122        | 0.033         | 0.074         | -0.422        |
| prox                            | 0.570              | -2.094        | -2.047        | -1.969        | -1.963        | -1.916        | -1.913        | -0.884        |
| terrestrial_volant              | 0.010              | 0.224         | 0.289         | 0.744         | 0.635         | 1.697         | 2.081         | 1.231         |
| c1                              | 0.560              | 0.481         | 0.674         | 2.068         | 2.043         | 3.769         | 4.098         | 0.298         |
| c2                              | 0.110              | 0.022         | 0.101         | 1.101         | 1.128         | 2.250         | 2.774         | 0.339         |
| <b>c3</b>                       | <b>0.960</b>       | <b>1.119</b>  | <b>1.930</b>  | <b>3.447</b>  | <b>3.481</b>  | <b>4.892</b>  | <b>5.390</b>  | <b>-0.158</b> |
| c4                              | 0.850              | 0.101         | 0.747         | 3.679         | 3.858         | 6.219         | 6.343         | -0.347        |
| c5                              | 0.690              | 0.001         | 0.097         | 3.755         | 4.791         | 6.247         | 6.333         | -0.526        |
| c6                              | 0.470              | 0.040         | 0.068         | 2.433         | 1.629         | 6.077         | 6.339         | 0.422         |
| c7                              | 0.870              | 0.001         | 0.343         | 2.631         | 2.794         | 4.263         | 5.670         | -0.824        |

|            |              |              |              |              |              |              |              |               |
|------------|--------------|--------------|--------------|--------------|--------------|--------------|--------------|---------------|
| c8         | 0.310        | 0.004        | 0.049        | 1.461        | 1.280        | 3.277        | 3.475        | 0.372         |
| c9         | 0.460        | 0.071        | 0.191        | 1.926        | 1.809        | 3.678        | 3.937        | 0.100         |
| c10        | 0.660        | 0.292        | 0.488        | 2.390        | 2.925        | 3.486        | 3.592        | -0.647        |
| <b>c11</b> | <b>1.000</b> | <b>2.392</b> | <b>2.693</b> | <b>3.884</b> | <b>3.608</b> | <b>6.376</b> | <b>6.619</b> | <b>1.293</b>  |
| <b>c12</b> | <b>0.930</b> | <b>0.322</b> | <b>1.153</b> | <b>4.122</b> | <b>4.499</b> | <b>5.463</b> | <b>5.786</b> | <b>-1.153</b> |
| c13        | 0.720        | 0.066        | 0.374        | 2.603        | 2.304        | 4.953        | 5.227        | 0.249         |
| c14        | 0.490        | 0.046        | 0.147        | 1.896        | 1.942        | 4.597        | 4.864        | 0.504         |
| c15        | 0.490        | 0.026        | 0.100        | 1.593        | 1.748        | 3.907        | 4.785        | 0.422         |
| c16        | 0.190        | 0.002        | 0.016        | 1.081        | 1.018        | 2.481        | 2.608        | 0.406         |
| c17        | 0.080        | 0.012        | 0.035        | 0.964        | 0.881        | 2.415        | 2.744        | 0.506         |
| c18        | 0.050        | 0.015        | 0.050        | 0.913        | 0.889        | 2.022        | 2.092        | 0.188         |
| c19        | 0.020        | 0.000        | 0.029        | 0.657        | 0.529        | 1.834        | 2.449        | 0.970         |
| c20        | 0.030        | 0.022        | 0.067        | 0.894        | 0.673        | 1.996        | 2.932        | 0.508         |
| c21        | 0.010        | 0.003        | 0.018        | 0.646        | 0.459        | 1.654        | 2.049        | 0.888         |
| c22        | 0.050        | 0.002        | 0.006        | 0.698        | 0.420        | 2.016        | 2.087        | 0.660         |
| c23        | 0.020        | 0.013        | 0.032        | 0.943        | 0.969        | 1.818        | 6.288        | 3.124         |
| c24        | 0.310        | 0.005        | 0.071        | 2.129        | 0.466        | 6.382        | 6.719        | 0.814         |
| c25        | 0.220        | 0.003        | 0.025        | 1.577        | 0.394        | 6.419        | 6.777        | 1.368         |
| c26        | 0.150        | 0.000        | 0.043        | 1.372        | 0.467        | 6.293        | 6.535        | 1.824         |
| c27        | 0.180        | 0.004        | 0.025        | 1.642        | 0.870        | 6.493        | 6.762        | 1.501         |
| c28        | 0.150        | 0.029        | 0.153        | 1.616        | 1.168        | 6.408        | 6.707        | 1.768         |
| c29        | 0.000        | 0.074        | 0.215        | 1.077        | 1.150        | 1.673        | 1.895        | -0.738        |
| c30        | 0.020        | 0.058        | 0.163        | 0.684        | 0.303        | 1.630        | 4.183        | 2.169         |
| c31        | 0.020        | 0.013        | 0.092        | 1.001        | 1.053        | 1.887        | 2.414        | 0.032         |
| c32        | 0.010        | 0.009        | 0.122        | 0.851        | 0.700        | 1.845        | 2.181        | 0.433         |
| c33        | 0.010        | 0.029        | 0.117        | 0.782        | 0.734        | 1.746        | 2.053        | 0.599         |
| c34        | 0.020        | 0.014        | 0.081        | 0.825        | 0.775        | 1.876        | 2.310        | 0.617         |
| c35        | 0.000        | 0.001        | 0.016        | 0.810        | 0.789        | 1.559        | 1.744        | -0.050        |
| c36        | 0.000        | 0.013        | 0.029        | 0.696        | 0.698        | 1.381        | 1.429        | 0.039         |
| c37        | 0.000        | 0.003        | 0.016        | 0.642        | 0.616        | 1.683        | 1.787        | 0.612         |
| c38        | 0.000        | 0.017        | 0.032        | 0.613        | 0.527        | 1.538        | 1.715        | 0.578         |
| c39        | 0.000        | 0.004        | 0.017        | 0.586        | 0.493        | 1.510        | 1.547        | 0.514         |
| c40        | 0.000        | 0.012        | 0.058        | 0.670        | 0.566        | 1.534        | 1.768        | 0.516         |
| c41        | 0.020        | 0.045        | 0.093        | 0.806        | 0.766        | 1.828        | 1.986        | 0.494         |
| c42        | 0.010        | 0.008        | 0.037        | 0.682        | 0.623        | 1.672        | 2.089        | 0.647         |
| c43        | 0.000        | 0.018        | 0.047        | 0.670        | 0.583        | 1.526        | 1.737        | 0.488         |
| c44        | 0.020        | 0.020        | 0.029        | 0.624        | 0.539        | 1.869        | 2.120        | 1.015         |
| c45        | 0.010        | 0.016        | 0.021        | 0.618        | 0.518        | 1.737        | 2.225        | 0.881         |
| c46        | 0.000        | 0.001        | 0.003        | 0.519        | 0.375        | 1.763        | 1.832        | 1.024         |
| c47        | 0.000        | 0.021        | 0.058        | 0.597        | 0.544        | 1.723        | 1.839        | 0.724         |

|             |              |              |              |              |              |              |              |              |
|-------------|--------------|--------------|--------------|--------------|--------------|--------------|--------------|--------------|
| c48         | 0.000        | 0.012        | 0.017        | 0.534        | 0.371        | 1.696        | 1.842        | 1.134        |
| c49         | 0.000        | 0.073        | 0.077        | 0.547        | 0.564        | 1.225        | 1.275        | 0.414        |
| c50         | 0.000        | 0.049        | 0.082        | 0.675        | 0.669        | 1.419        | 1.496        | 0.344        |
| c51         | 0.000        | 0.076        | 0.106        | 0.642        | 0.654        | 1.195        | 1.231        | 0.037        |
| c52         | 0.000        | 0.595        | 0.607        | 0.830        | 0.812        | 1.084        | 1.101        | 0.171        |
| c53         | 0.000        | 0.314        | 0.340        | 0.601        | 0.683        | 0.723        | 0.724        | -0.706       |
| c54         | 0.000        | NA           | NA           | NA           | NA           | NA           | NA           | NA           |
| <b>Freq</b> | <b>1.000</b> | <b>4.347</b> | <b>4.565</b> | <b>5.462</b> | <b>5.500</b> | <b>6.492</b> | <b>6.535</b> | <b>0.052</b> |

---
