# Supplementary material for: Traits, phylogeny and host cell receptors predict Ebolavirus host status among African mammals
Source: PubMed Central journal article supplement (PMC9815631; doi:10.1371/journal.pntd.0010993), 2022-12-21
Supplement: pntd.0010993.s005.pdf [file pntd.0010993.s005.pdf]

**S4 Table for “Traits, phylogeny and host cell receptors predict *Ebolavirus* host status of African mammals”**

Mekala Sundaram, John Paul Schmidt, Barbara A. Han, John M. Drake, Patrick R. Stephens

**S4 Table. Ridge regression predicting infection status of animal host on the basis of Niemann-Pick C1 animal acid residues, distance to spillover site (m) and sampling effort.**

Results provided for two models: one based on NPC1, distance to spillover site and sampling effort; the other based only on NPC1 residues. For each predictor, a coefficient estimate is provided, along with accompanying t-value and p-value. Bold faced predictors are significant at  $\alpha$  of 0.05. Italicized predictors are significant at  $\alpha$  of 0.1.

|               | NPC1 with distance to spillover and sampling effort |               |              | NPC1 sequences |               |              |
|---------------|-----------------------------------------------------|---------------|--------------|----------------|---------------|--------------|
|               | Estimate                                            | t value       | Pr(> t )     | Estimate       | t value       | Pr(> t )     |
| P410_Q        | -0.116                                              | -0.212        | 0.832        | -0.246         | -0.390        | 0.697        |
| P410_R        | 0.116                                               | 0.212         | 0.832        | 0.246          | 0.390         | 0.697        |
| P413_P        | -0.418                                              | -1.467        | 0.143        | -0.429         | -1.354        | 0.176        |
| P413_T        | 0.418                                               | 1.467         | 0.143        | 0.429          | 1.354         | 0.176        |
| P414_H        | -0.279                                              | -0.969        | 0.333        | -0.339         | -1.086        | 0.277        |
| P414_L        | 0.104                                               | 0.514         | 0.607        | 0.132          | 0.618         | 0.537        |
| P414_N        | -0.045                                              | -0.157        | 0.875        | -0.032         | -0.098        | 0.922        |
| P414_Y        | 0.577                                               | 1.372         | 0.170        | 0.647          | 1.411         | 0.158        |
| P415_N        | 0.418                                               | 1.467         | 0.143        | 0.429          | 1.354         | 0.176        |
| P415_S        | -0.468                                              | -0.908        | 0.364        | -0.560         | -0.984        | 0.325        |
| P415_T        | 0.139                                               | 0.311         | 0.756        | 0.209          | 0.424         | 0.671        |
| P416_A        | 0.268                                               | 0.655         | 0.513        | 0.281          | 0.622         | 0.534        |
| P416_D        | 0.178                                               | 0.517         | 0.605        | 0.189          | 0.495         | 0.621        |
| P416_K        | 0.577                                               | 1.372         | 0.170        | 0.647          | 1.411         | 0.158        |
| <b>P416_P</b> | <b>-0.864</b>                                       | <b>-2.035</b> | <b>0.042</b> | <b>-0.945</b>  | <b>-2.010</b> | <b>0.044</b> |
| P416_Q        | 0.418                                               | 1.467         | 0.143        | 0.429          | 1.354         | 0.176        |
| P416_S        | -0.355                                              | -1.079        | 0.281        | -0.346         | -0.934        | 0.350        |
| P417_I        | 0.435                                               | 0.767         | 0.443        | 0.376          | 0.587         | 0.557        |
| P417_K        | 0.104                                               | 0.514         | 0.607        | 0.132          | 0.618         | 0.537        |
| P417_M        | 0.631                                               | 1.215         | 0.225        | 0.743          | 1.296         | 0.195        |
| P417_P        | -0.667                                              | -1.426        | 0.154        | -0.732         | -1.406        | 0.160        |
| P417_S        | 0.418                                               | 1.467         | 0.143        | 0.429          | 1.354         | 0.176        |
| P417_T        | -0.262                                              | -0.730        | 0.465        | -0.338         | -0.869        | 0.385        |
| P417_V        | -0.237                                              | -0.644        | 0.520        | -0.207         | -0.507        | 0.612        |
| P418_H        | -0.577                                              | -1.372        | 0.170        | -0.647         | -1.411        | 0.158        |
| P418_S        | 0.577                                               | 1.372         | 0.170        | 0.647          | 1.411         | 0.158        |
| P419_I        | -0.194                                              | -0.289        | 0.773        | -0.185         | -0.242        | 0.809        |

|               |               |               |              |               |               |              |
|---------------|---------------|---------------|--------------|---------------|---------------|--------------|
| P419_K        | 0.652         | 1.047         | 0.295        | 0.735         | 1.066         | 0.286        |
| P419_T        | -0.078        | -0.118        | 0.906        | -0.120        | -0.160        | 0.872        |
| P421_E        | -0.240        | -0.674        | 0.500        | -0.172        | -0.435        | 0.663        |
| P421_H        | -0.036        | -0.095        | 0.924        | -0.090        | -0.215        | 0.830        |
| P421_Q        | 0.243         | 0.724         | 0.469        | 0.208         | 0.561         | 0.575        |
| <b>P425_A</b> | <b>1.107</b>  | <b>2.617</b>  | <b>0.009</b> | <b>1.253</b>  | <b>2.660</b>  | <b>0.008</b> |
| P425_S        | -0.566        | -1.522        | 0.128        | -0.576        | -1.414        | 0.157        |
| <b>P425_T</b> | <i>-0.611</i> | <i>-1.722</i> | <i>0.085</i> | <b>-0.790</b> | <b>-2.061</b> | <b>0.039</b> |
| <b>P426_E</b> | <i>-0.611</i> | <i>-1.722</i> | <i>0.085</i> | <b>-0.790</b> | <b>-2.061</b> | <b>0.039</b> |
| <b>P426_G</b> | <i>0.611</i>  | <i>1.722</i>  | <i>0.085</i> | <b>0.790</b>  | <b>2.061</b>  | <b>0.039</b> |
| P427_A        | -0.165        | -0.711        | 0.477        | -0.117        | -0.469        | 0.639        |
| <i>P427_S</i> | <i>0.549</i>  | <i>1.797</i>  | <i>0.072</i> | <i>0.610</i>  | <i>1.839</i>  | <i>0.066</i> |
| <b>P427_T</b> | <i>-0.611</i> | <i>-1.722</i> | <i>0.085</i> | <b>-0.790</b> | <b>-2.061</b> | <b>0.039</b> |
| P433_A        | -0.468        | -0.960        | 0.337        | -0.553        | -1.032        | 0.302        |
| P433_P        | 0.468         | 0.960         | 0.337        | 0.553         | 1.032         | 0.302        |
| P436_A        | -0.487        | -1.078        | 0.281        | -0.462        | -0.909        | 0.363        |
| P436_D        | 0.083         | 0.240         | 0.810        | 0.083         | 0.221         | 0.825        |
| P436_N        | 0.014         | 0.036         | 0.971        | -0.005        | -0.012        | 0.991        |
| P436_S        | 0.418         | 1.467         | 0.143        | 0.429         | 1.354         | 0.176        |
| <i>P437_I</i> | <i>0.581</i>  | <i>1.767</i>  | <i>0.077</i> | <i>0.621</i>  | <i>1.703</i>  | <i>0.089</i> |
| P437_K        | -0.639        | -1.512        | 0.131        | -0.701        | -1.474        | 0.140        |
| P437_R        | 0.012         | 0.025         | 0.980        | 0.028         | 0.052         | 0.959        |
| P437_V        | -0.179        | -0.392        | 0.695        | -0.179        | -0.349        | 0.727        |
| P490_D        | -0.057        | -0.114        | 0.909        | -0.025        | -0.044        | 0.965        |
| P490_E        | 0.391         | 1.384         | 0.166        | 0.389         | 1.268         | 0.205        |
| P490_G        | -0.469        | -1.241        | 0.215        | -0.492        | -1.168        | 0.243        |
| P490_N        | -0.179        | -0.392        | 0.695        | -0.179        | -0.349        | 0.727        |
| P490_Q        | -0.065        | -0.277        | 0.782        | -0.067        | -0.267        | 0.789        |
| P491_N        | 0.382         | 0.915         | 0.360        | 0.485         | 1.063         | 0.288        |
| P491_S        | -0.382        | -0.915        | 0.360        | -0.485        | -1.063        | 0.288        |
| P493_A        | -0.355        | -1.079        | 0.281        | -0.346        | -0.934        | 0.350        |
| P493_L        | 0.382         | 0.915         | 0.360        | 0.485         | 1.063         | 0.288        |
| P493_S        | 0.067         | 0.188         | 0.851        | -0.002        | -0.006        | 0.995        |
| P494_L        | -0.523        | -0.887        | 0.375        | -0.567        | -0.861        | 0.389        |
| P494_M        | 0.642         | 1.606         | 0.108        | 0.693         | 1.578         | 0.114        |
| P494_T        | -0.338        | -0.981        | 0.327        | -0.441        | -1.198        | 0.231        |
| P494_V        | -0.129        | -0.483        | 0.629        | -0.086        | -0.295        | 0.768        |
| <i>P496_D</i> | <i>-0.781</i> | <i>-1.744</i> | <i>0.081</i> | <i>-0.799</i> | <i>-1.602</i> | <i>0.109</i> |
| <i>P496_N</i> | <i>0.781</i>  | <i>1.744</i>  | <i>0.081</i> | <i>0.799</i>  | <i>1.602</i>  | <i>0.109</i> |
| P497_H        | 0.355         | 1.079         | 0.281        | 0.346         | 0.934         | 0.350        |

|                 |               |               |              |               |               |              |
|-----------------|---------------|---------------|--------------|---------------|---------------|--------------|
| P497_N          | -0.211        | -0.395        | 0.693        | -0.196        | -0.328        | 0.743        |
| P497_S          | -0.283        | -0.536        | 0.592        | -0.286        | -0.484        | 0.628        |
| <i>P498_E</i>   | <i>-0.669</i> | <i>-1.772</i> | <i>0.076</i> | <i>-0.740</i> | <i>-1.779</i> | <i>0.075</i> |
| P498_K          | 0.560         | 1.515         | 0.130        | 0.606         | 1.473         | 0.141        |
| P498_Q          | -0.362        | -1.204        | 0.229        | -0.334        | -0.989        | 0.323        |
| P498_T          | 0.435         | 0.767         | 0.443        | 0.376         | 0.587         | 0.557        |
| P499_I          | 0.165         | 0.711         | 0.477        | 0.117         | 0.469         | 0.639        |
| P499_K          | 0.104         | 0.514         | 0.607        | 0.132         | 0.618         | 0.537        |
| P499_V          | -0.362        | -1.204        | 0.229        | -0.334        | -0.989        | 0.323        |
| P502_A          | -0.523        | -0.887        | 0.375        | -0.567        | -0.861        | 0.389        |
| P502_D          | 0.086         | 0.200         | 0.841        | 0.124         | 0.266         | 0.790        |
| <i>P502_F</i>   | <i>0.575</i>  | <i>1.691</i>  | <i>0.091</i> | <i>0.657</i>  | <i>1.766</i>  | <i>0.077</i> |
| P502_P          | -0.439        | -0.730        | 0.466        | -0.583        | -0.869        | 0.385        |
| P504_F          | 0.380         | 0.931         | 0.352        | 0.525         | 1.150         | 0.250        |
| P504_Y          | -0.380        | -0.931        | 0.352        | -0.525        | -1.150        | 0.250        |
| P505_I          | -0.384        | -0.690        | 0.490        | -0.418        | -0.663        | 0.507        |
| P505_T          | -0.014        | -0.028        | 0.978        | 0.069         | 0.120         | 0.905        |
| P505_V          | 0.291         | 0.766         | 0.444        | 0.256         | 0.607         | 0.544        |
| P513_F          | 0.469         | 1.241         | 0.215        | 0.492         | 1.168         | 0.243        |
| P513_L          | -0.469        | -1.241        | 0.215        | -0.492        | -1.168        | 0.243        |
| P516_C          | 0.179         | 0.392         | 0.695        | 0.179         | 0.349         | 0.727        |
| P516_W          | -0.179        | -0.392        | 0.695        | -0.179        | -0.349        | 0.727        |
| <b>Distance</b> | <b>-2.341</b> | <b>-2.599</b> | <b>0.009</b> |               |               |              |
| Sample size     | 0.008         | 0.009         | 0.993        |               |               |              |

---
