# Supplementary material for: Traits, phylogeny and host cell receptors predict Ebolavirus host status among African mammals
Source: PubMed Central journal article supplement (PMC9815631; doi:10.1371/journal.pntd.0010993), 2022-12-21
Supplement: pntd.0010993.s006.pdf [file pntd.0010993.s006.pdf]

**S5 Table for “Traits, phylogeny and host cell receptors predict *Ebolavirus* host status of African mammals”**

Mekala Sundaram, John Paul Schmidt, Barbara A. Han, John M. Drake, Patrick R. Stephens

**S5 Table.** NPC1 residues at key positions identified by Takadate et al. (DOI: 10.1016/j.celrep.2019.12.042) for species for whom infection status is also known. Amino acid residues at positions 425-427 (P425-P427) are believed to confer resistance to *Marburgvirus* and residues in 502 and 505 (P502 and P505) are believed to confer resistance to *Ebolavirus*. Column ‘infection status’ represents known infection status determined from studies with antibody and PCR tests. Column ‘NPC1 model predictions’ provides estimated 0 and 1 predictions for species infection status based on a ridge regression model with species NPC1 sequences as predictors.

| Species                          | P425 | P426 | P427 | P502 | P505 | Infection status | NPC1 model predictions |
|----------------------------------|------|------|------|------|------|------------------|------------------------|
| <i>Eidolon_helvum</i>            | A    | G    | S    | F    | T    | 1                | 1                      |
| <i>Rousettus_aegyptiacus</i>     | A    | G    | S    | D    | V    | 1                | 1                      |
| <i>Rousettus_leschenaultii</i>   | A    | G    | S    | D    | V    | 1                | 1                      |
| <i>Miniopterus_schreibersii</i>  | S    | G    | S    | D    | V    | 1                | 1                      |
| <i>Rhinolophus_ferrumequinum</i> | S    | G    | S    | D    | V    | 1                | 1                      |
| <i>Mus_musculus</i>              | A    | G    | A    | D    | I    | 0                | 0                      |
| <i>Homo_sapiens</i>              | S    | G    | A    | D    | V    | 1                | 1                      |
| <i>Rattus_norvegicus</i>         | S    | G    | A    | D    | V    | 0                | 0                      |
| <i>Bos_taurus</i>                | S    | G    | A    | D    | V    | 0                | 0                      |
| <i>Macaca_mulatta</i>            | S    | G    | A    | D    | V    | 0                | 1                      |
| <i>Pan_troglodytes</i>           | S    | G    | A    | D    | V    | 1                | 1                      |
| <i>Sus_scrofa</i>                | A    | G    | A    | F    | V    | 1                | 1                      |
| <i>Pteropus_alecto</i>           | T    | E    | T    | D    | V    | 0                | 0                      |
| <i>Artibeus_jamaicensis</i>      | S    | G    | S    | P    | V    | 0                | 0                      |
| <i>Desmodus_rotundus</i>         | S    | G    | S    | A    | V    | 0                | 0                      |
| <i>Sapajus_apella</i>            | S    | G    | A    | D    | V    | 0                | 0                      |
| <i>Cercocebus_atys</i>           | S    | G    | A    | D    | V    | 1                | 1                      |
| <i>Macaca_fascicularis</i>       | S    | G    | A    | D    | V    | 0                | 1                      |
| <i>Macaca_nemestrina</i>         | S    | G    | A    | D    | V    | 0                | 1                      |
| <i>Papio_anubis</i>              | S    | G    | A    | D    | V    | 1                | 1                      |
| <i>Mandrillus_leucophaeus</i>    | S    | G    | A    | D    | V    | 1                | 1                      |
| <i>Gorilla_gorilla</i>           | S    | G    | A    | D    | V    | 1                | 1                      |
| <i>Pan_paniscus</i>              | S    | G    | A    | D    | V    | 0                | 1                      |
| <i>Ovis_aries</i>                | S    | G    | A    | D    | V    | 0                | 0                      |
| <i>Molossus_molossus</i>         | S    | G    | S    | D    | V    | 0                | 0                      |

|                             |   |   |   |   |   |   |   |
|-----------------------------|---|---|---|---|---|---|---|
| <i>Myotis_myotis</i>        | S | G | S | D | I | 0 | 0 |
| <i>Pipistrellus_kuhlii</i>  | S | G | S | D | T | 0 | 0 |
| <i>Chlorocebus_sabaeus</i>  | S | G | A | D | V | 0 | 1 |
| <i>Pteropus_vampyrus</i>    | T | E | T | D | V | 0 | 0 |
| <i>Pteropus_giganteus</i>   | T | E | T | D | V | 0 | 0 |
| <i>Hipposideros_armiger</i> | A | G | S | D | V | 1 | 1 |

---
